# Supplementary material
Source: MDPI journal article supplement (https://www.mdpi.com/2073-4441/16/10/1419)
Supplement: s1 [file s1]

Supplementary Materials

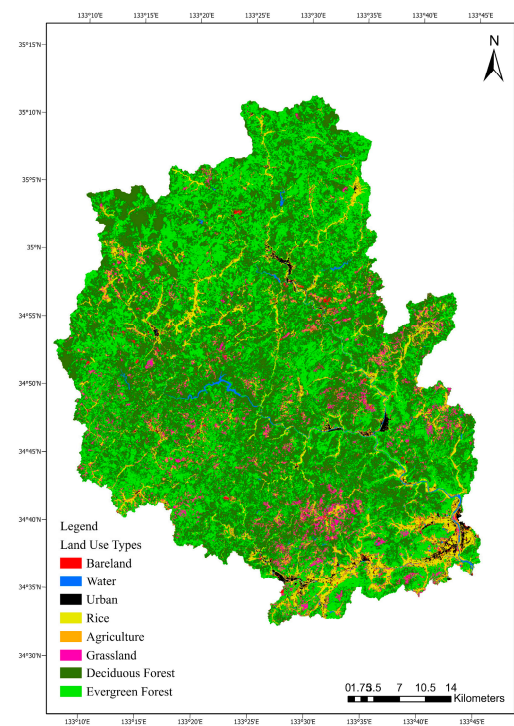

Figure S1. Land cover types of Takahashi catchment

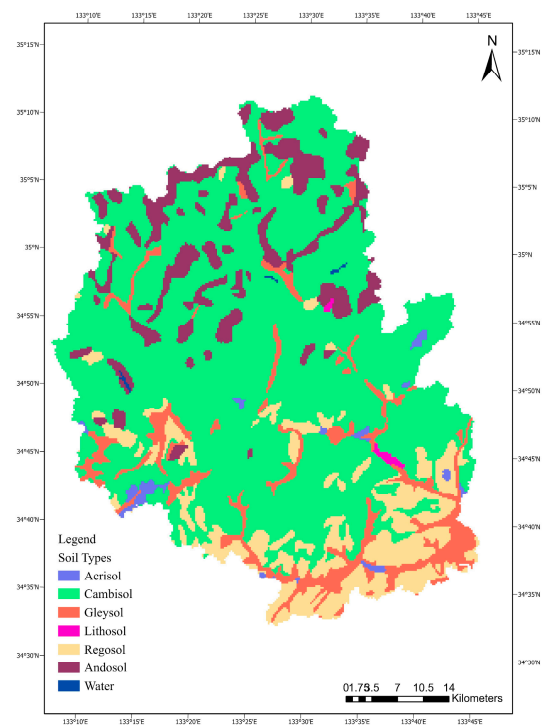

Figure S2. Soil types in Takahashi catchment

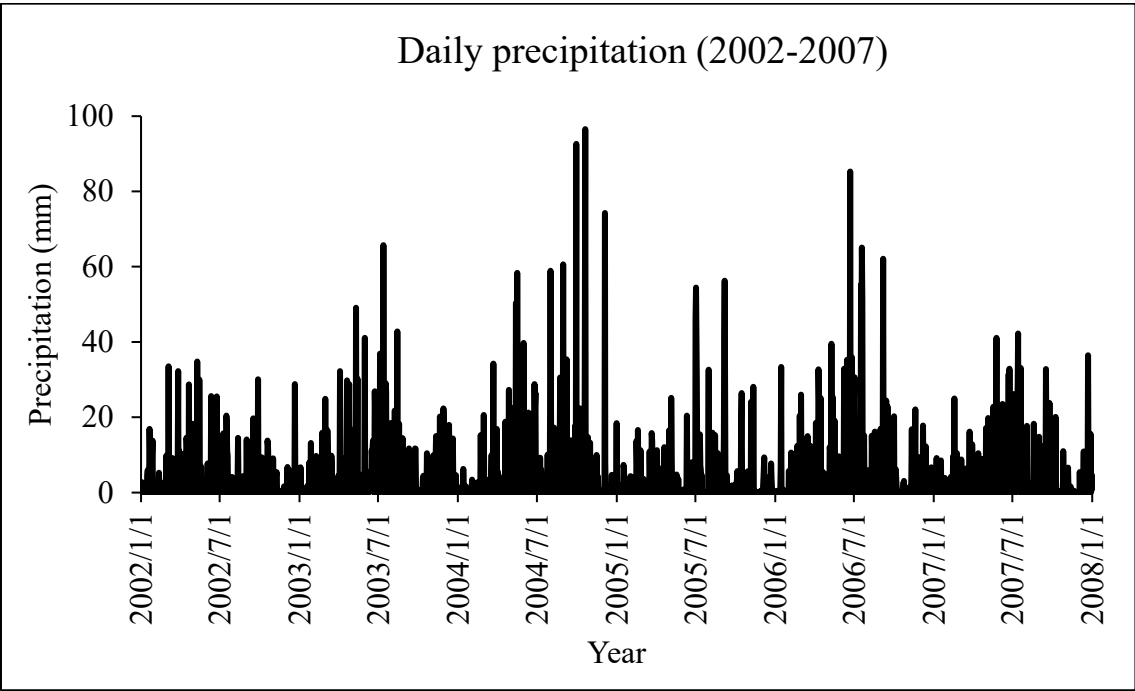

Figure S3. Daily average precipitation across the Takahashi catchment

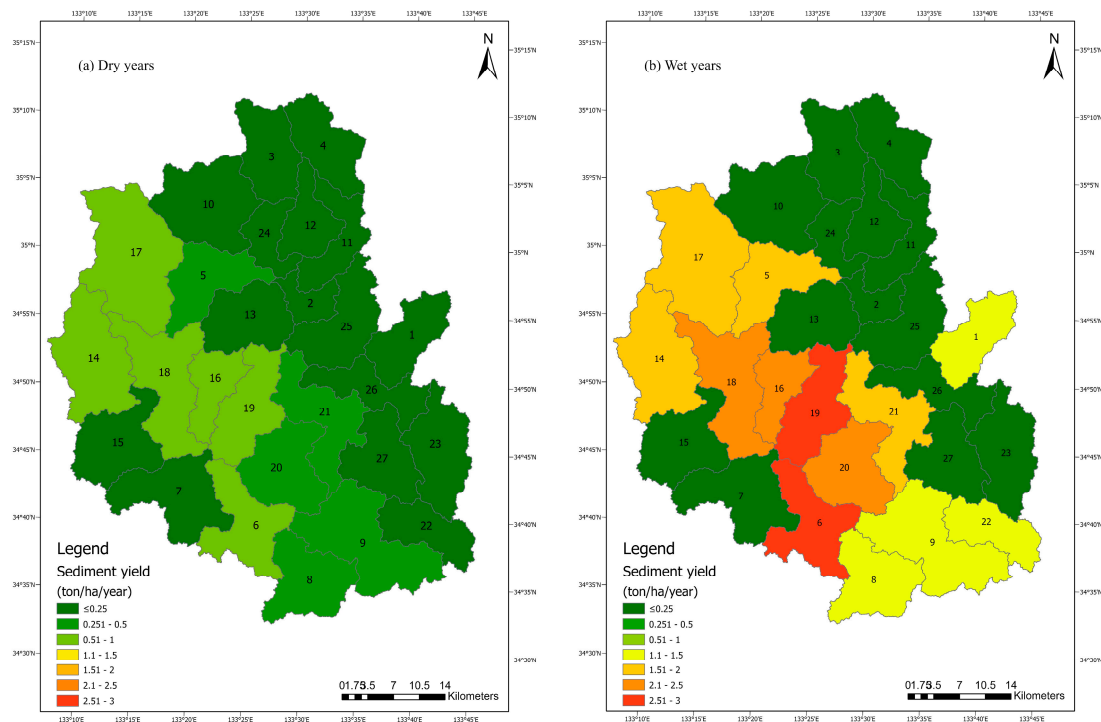

Figure S4. Comparison of annual sediment yield spatial variation between (a) dry years and (b) wet years

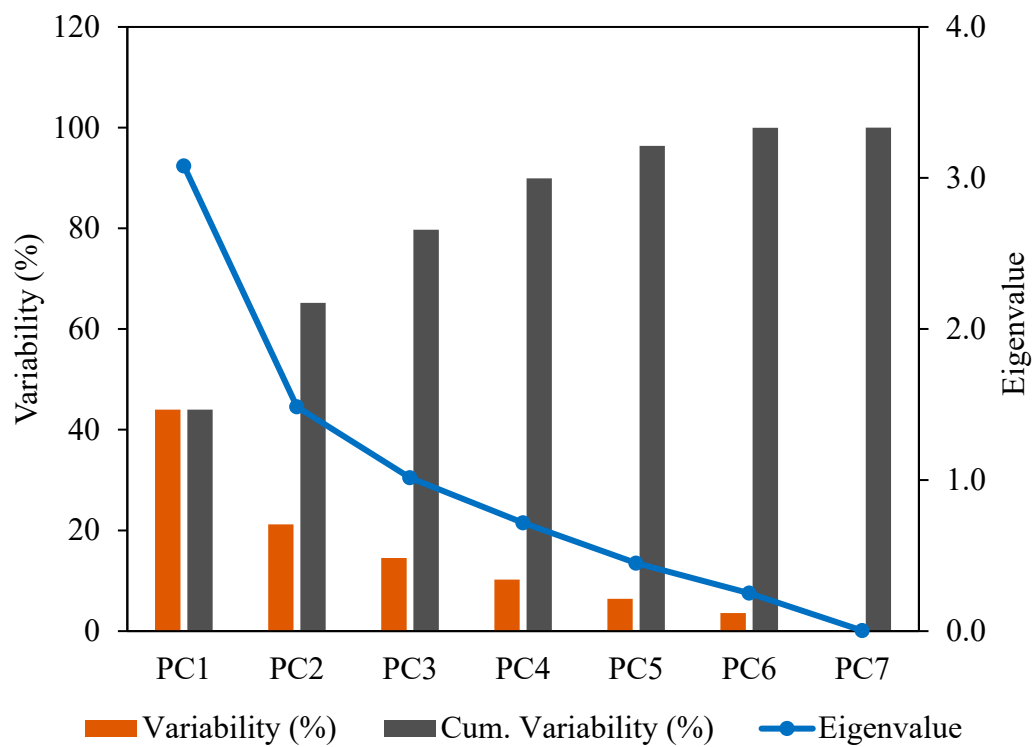

Figure S5. Eigenvalues and explained variance by principal components

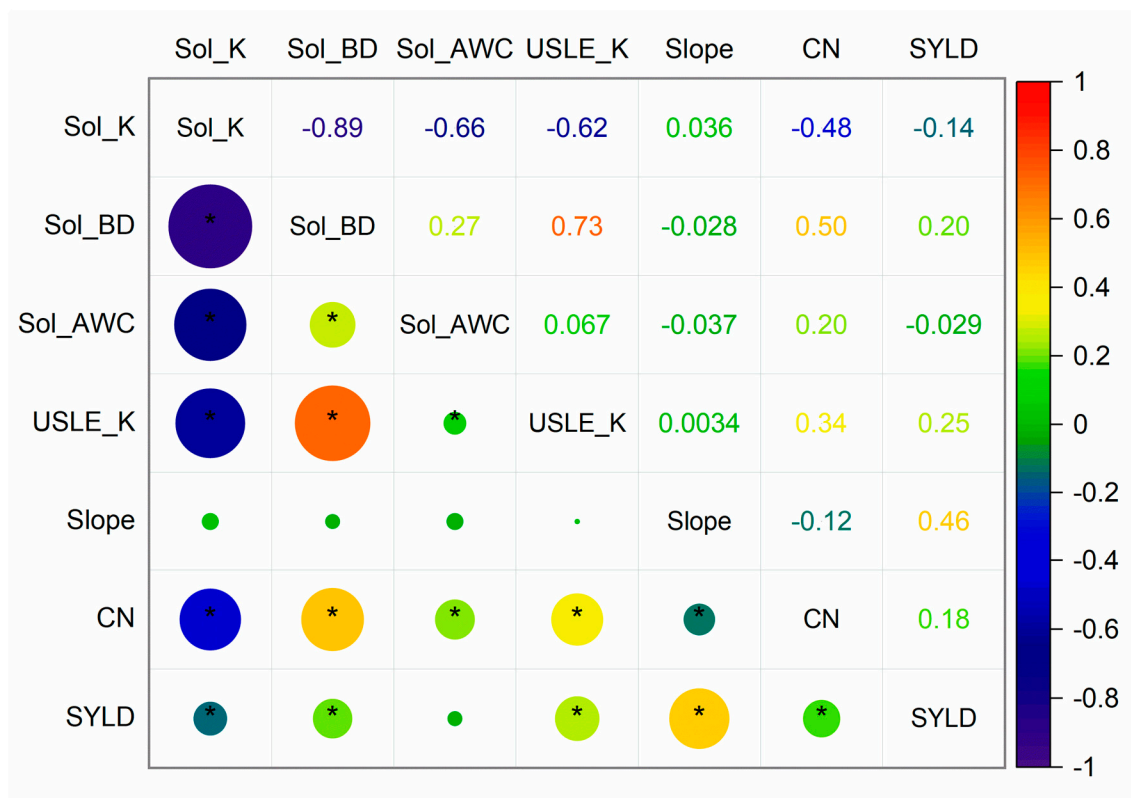

Note: Values marked as ‘\*’ are different from 0 at a significant level  $\alpha = 0.05$ .

Figure S6. Correlation matrix of the identified components

Table S1. Calibrated parameters for streamflow and sediment

|      | Modification<br>type | Parameter<br>Name | Description                                                                                               | Minimum | Maximum | Fitted | Remark                  |
|------|----------------------|-------------------|-----------------------------------------------------------------------------------------------------------|---------|---------|--------|-------------------------|
| Flow | r                    | CN2               | SCS runoff curve<br>number                                                                                | -0.2    | 0.1     | -0.018 | FRSD                    |
|      |                      |                   |                                                                                                           |         |         | 0.04   | FRSE                    |
|      |                      |                   |                                                                                                           |         |         | -0.05  | GRAS,<br>RICE           |
|      |                      |                   |                                                                                                           |         |         | -0.1   | AGRL                    |
|      |                      |                   |                                                                                                           |         |         | -0.159 | BARR                    |
|      |                      |                   |                                                                                                           |         |         | -0.2   | URBN                    |
|      | v                    | RCHRG_DP          | Deep aquifer<br>percolation fraction                                                                      | 0.25    | 0.35    | 0.31   |                         |
|      | v                    | ESCO              | Soil evaporation<br>compensation<br>factor                                                                | 0.15    | 0.8     | 0.181  | FRSD,<br>FRSE           |
|      |                      |                   |                                                                                                           |         |         | 0.675  | AGRL,<br>RICE           |
|      |                      |                   |                                                                                                           |         |         | 0.66   | GRAS                    |
|      |                      |                   |                                                                                                           |         |         | 0.8    | BARR,<br>URBN           |
|      | r                    | SOL_K             | Saturated hydraulic<br>conductivity                                                                       | -0.2    | 0.2     | -0.098 |                         |
|      | r                    | SOL_AWC           | Available water<br>capacity of the soil<br>layer                                                          | -0.2    | 0.2     | 0.011  |                         |
|      | r                    | SOL_BD            | Moist bulk density                                                                                        | -0.2    | 0.2     | 0.018  |                         |
|      | v                    | GWQMN             | Threshold depth of<br>water in the<br>shallow aquifer<br>required for the<br>return flow to occur<br>(mm) | 150     | 3000    | 200*   | 1-5,10-<br>21,24-<br>27 |
|      |                      |                   |                                                                                                           |         |         | 2000   | 6-9                     |
|      |                      |                   |                                                                                                           |         |         | 3000   | 22,23                   |
|      | v                    | CH_N2             | Manning's "n"<br>value for the main<br>channel                                                            | 0.02    | 0.1     | 0.069  | 1-5,10-<br>21,24-<br>27 |
|      |                      |                   |                                                                                                           |         |         | 0.055  | 6-9                     |
|      |                      |                   |                                                                                                           |         |         | 0.068  | 22,23                   |
|      | v                    | ALPHA_BF          | Baseflow alpha<br>factor (days)                                                                           | 0.2     | 0.7     | 0.375  |                         |
|      | r                    | HRU_SLP           | Average slope<br>steepness                                                                                | -0.35   | -0.1    | -0.28  |                         |

|          | Modification<br>type | Parameter<br>Name | Description                                                                                                                               | Minimum | Maximum | Fitted | Remark                 |
|----------|----------------------|-------------------|-------------------------------------------------------------------------------------------------------------------------------------------|---------|---------|--------|------------------------|
| Sediment | v                    | CANMAX            | Maximum canopy<br>storage                                                                                                                 | 5       | 25      | 11.2   |                        |
|          | v                    | CH_COV1           | Channel erodibility<br>factor                                                                                                             | 0.01    | 0.06    | 0.037  |                        |
|          | v                    | CH_COV2           | Channel cover<br>factor                                                                                                                   | 0.01    | 0.1     | 0.057  |                        |
|          | v                    | USLE_P            | Support practice<br>factor                                                                                                                | 0       | 0.5     | 0.005  |                        |
|          | r                    | USLE_C            | Minimum USLE<br>cover factor                                                                                                              | -0.25   | 0.25    | 0.018  | RICE                   |
|          |                      |                   |                                                                                                                                           |         |         | 0.01   | FRSD,<br>FRSE,<br>GRAS |
|          | r                    | PRF_BSN           | Peak rate<br>adjustment factor<br>for sediment<br>routing in the main<br>channel                                                          | 0       | 1       | 0.85   |                        |
|          | v                    | SPCON             | Linear parameter<br>for calculating the<br>maximum amount<br>of sediment that<br>can be reentrained<br>during channel<br>sediment routing | 0.001   | 0.01    | 0.009  |                        |
|          | v                    | SPEXP             | Exponent<br>parameter for<br>calculating<br>sediment<br>reentrained during<br>channel sediment<br>routing                                 | 1       | 1.5     | 1.39   |                        |

r indicates that the parameter value is changed relatively, and v indicates that the default parameter is replaced, \* represents the value for limestone-influenced subbasins.
